# Supplementary material for: Snf2 Proteins Are Required to Generate Gamete Pronuclei in Tetrahymena thermophila
Source: MDPI journal article supplement (doi:10.3390/microorganisms10122426), 2022-12-07
Supplement: s1 [file s1]

**SUPPLEMENTAL MATERIALS**  
**Supplemental figures**

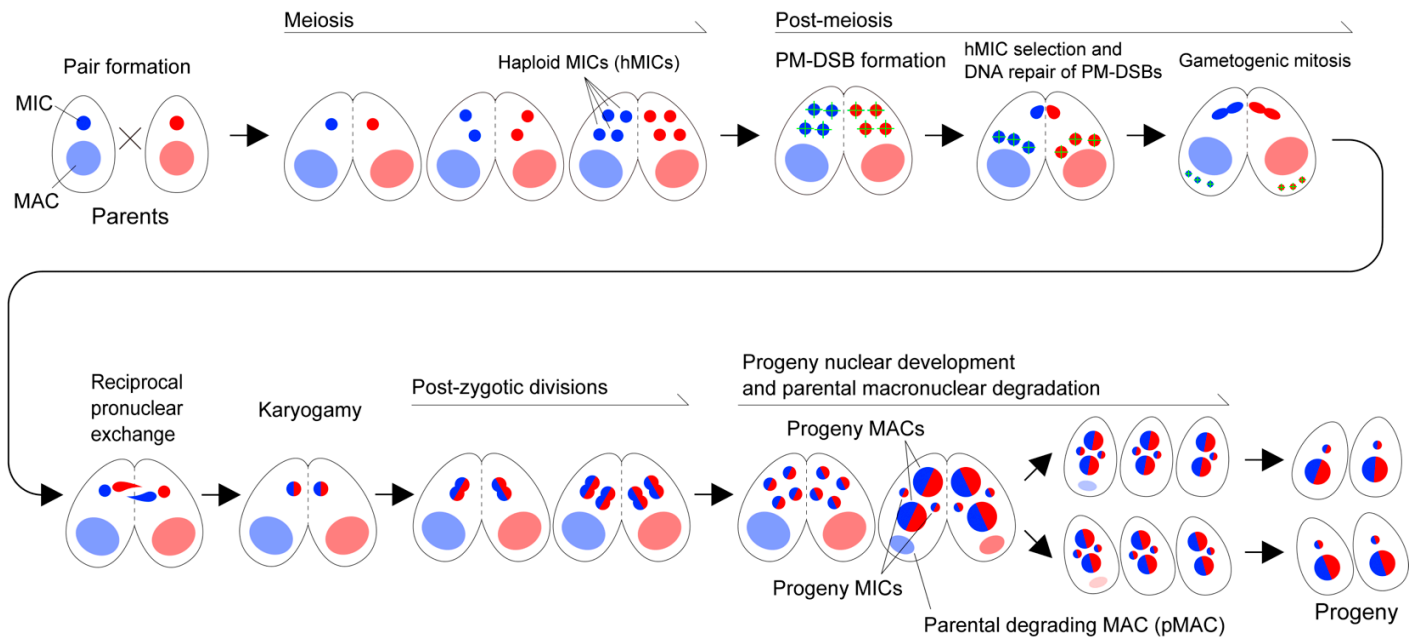

**Supplemental figure S1** Representative nuclear events during *Tetrahymena* conjugation. **Pair formation:** When two starved cells of different mating types are mixed, they form a pair. **Meiosis:** After pair formation the MIC undergoes meiosis, resulting in four identical haploid MICs (hMICs). **Post-meiosis stage:** Post-meiotic DNA double-strand break (PM-DSB) formation takes place in all hMICs, cleaving their genome. As a result,  $\gamma$ -H2AX, an epigenetic marker for DNA lesions, appears. DNA lesions are repaired and  $\gamma$ -H2AX foci disappear in one of four hMICs. This is the selected hMIC, and the nucleus undergoes gametogenic mitosis, resulting in the production of two gametic pronuclei. **Reciprocal nuclear exchange and karyogamy:** One of the two gametic pronuclei is mutually exchanged with a partner cell. Then they fuse. **Post-zygotic mitosis:** The zygotic nucleus undergoes two rounds of mitosis, resulting in four zygotic nuclei. **Progeny nuclear development and parental MAC degradation:** Two of four zygotic nuclei locating in the anterior region of the cytoplasm become progeny MAC Anlagen. They swell and undergo differentiation involving genome rearrangement. The remaining two posterior nuclei become progeny MICs. Concurrently with progeny nuclear development, the parental MAC loses transcriptional activity and is eliminated from the cytoplasm via autophagy.

## A C-Terminal EGFP tagging

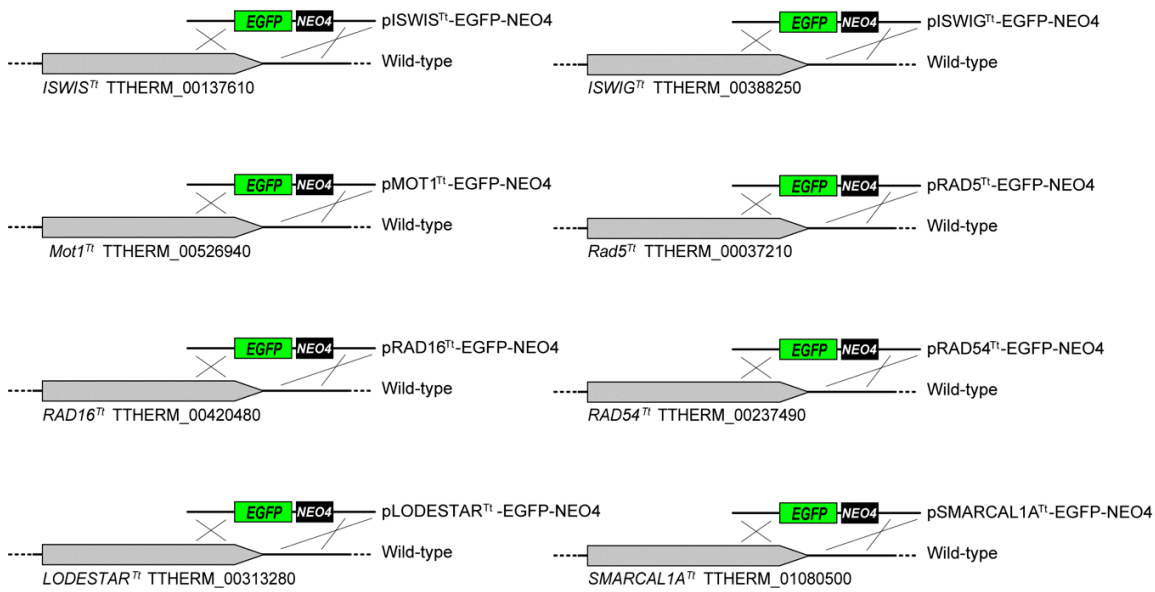

## B N-Terminal mCherry tagging

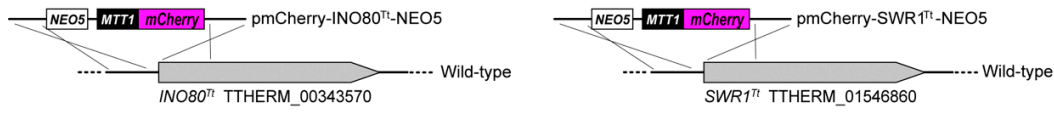

**Supplemental figure S2** Cartoon showing the fluorescent-tag knock-in strategy.

## "DNA preparation"

1 DNA fragment for transformation is amplified by PCR as in below.

Volume: 320–400  $\mu$ l (40–50  $\mu$ l x 8 tubes)

Enzyme: TaKaRa PrimeSTAR MAX DNA polymerase

Primer: M13 forward primer and M13 reverse primer

Thermal cycler: ABI9700 by the Life Technologies

Thermal condition:

Initial denature: 98°C, 50 sec

Denature\*: 98°C, 10 sec

Annealing\*: 50°C, 15 sec

Elongation\*: 72°C, 60 sec

\*From the denature to the elongation, are cycled 35 times.

Additional elongation: 72°C, 120 sec

2 Amplified DNA is purified by the Monarch PCR & DNA Cleanup Kit (NEB).

Tips for DNA purification.

1) Amplified products with four tubes are gathered into one collection tube.

2) Separately purchased Monarch Plasmid Miniprep Columns are applied for the DNA binding step.

3) 50–80  $\mu$ l of the DNA elution buffer per column is applied.

As a result, 100–160  $\mu$ l of DNA solution containing 25–50  $\mu$ g of DNA for the transfection is obtained.

## "Electroporation"

1 *Tetrahymena* cells are grown in 10 ml of SPP at 30°C with shaking overnight.

2 Cells are harvested by centrifugation at 300 g for 3 min, then the supernatant is discarded.

3 The collected cells are suspended with 10 ml of 10 mM Tris-HCl at pH 7.6.

4 The wash step (2–3) is repeated.

5 Washed cells are suspended in 10 ml of 10 mM Tris-HCl at pH 7.6 and are left at 30°C without shaking overnight

6 Cells are harvested by centrifugation at 300 g for 3 min, then the supernatant is discarded.

7 The collected cells are suspended with 10 ml of 10 mM Hepes-NaOH at pH 7.5. and left at least 5 min.

8 Cells are harvested by centrifugation at 300 g for 3 min, then the supernatant is discarded\*.

\*At step 8, a small amount of buffer is left to become the total volume as 500  $\mu$ l.

9 Immediately, the cell pellet is resuspended with the remaining buffer, then the cell suspension is transferred into a 1.5 ml tube.

10 Cells are collected at 1000 g for 2 min, then the supernatant is removed completely.

11 The purified DNA for the transfection is added, and the cell pellet is suspended completely by vortex for as short a time as possible.

12 The cell suspension with DNA for the transfection is transferred into an electroporation cuvette with a 2 mm gap.

13 Electroporation is carried out at 25  $\mu$ F, 230 V, and 400 $\Omega$ .

\*The pulsed-time and applied voltages are usually in the following ranges.

Pulsed-time: 3.0–5.0 msec, Applied voltage: 220–235 V

14 After plus, the cell suspension is transferred into 40 ml of SPP and left at 30 °C for 3–4 h with shaking.

15\* CdCl<sub>2</sub> is added (final concentration: 1  $\mu$ g/ml) to activate the NEO4 cassette, then the cells are incubated at 30°C for 1 h.

\*This is an unnecessary step if NEO5 is used.

16 Add paromomycin sulfate to reach the concentration of 100  $\mu$ g/ml, then the cells are transferred to two 96-well plates.

17 The plates are incubated at 30°C. Resistant cells will appear within 3 days.

**Supplemental figure S3** The detailed procedure for DNA transfection into the MAC with electroporation. The procedure for DNA transfection into the MAC in starved cells is performed in a similar manner to the DNA transfection into conjugating cells.



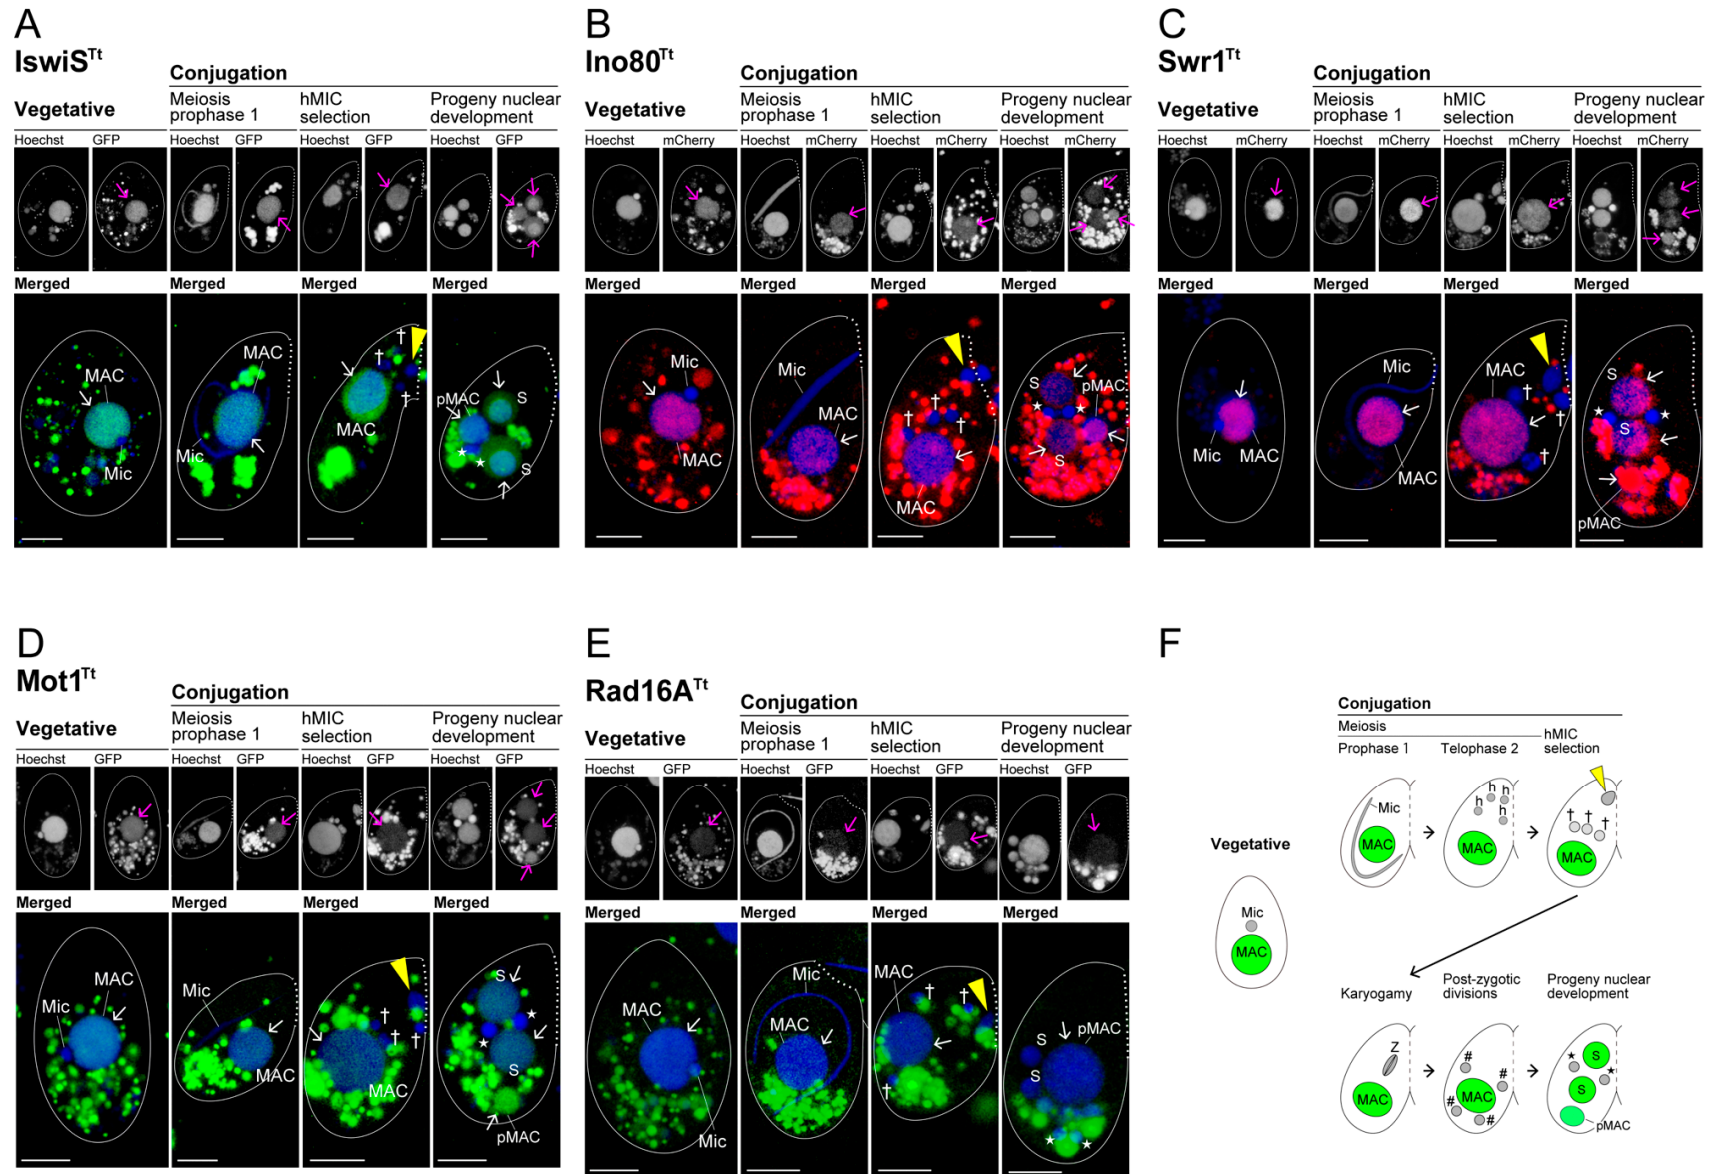

**Supplemental figure S5** Subcellular localization of *Tetrahymena* Snf2 family proteins tagged with fluorescent proteins. Tagged proteins shown here exclusively localized to the MAC. **A)** C-terminally GFP-tagged IswiS<sup>Tt</sup>. **B)** N-terminally mCherry-tagged Ino80<sup>Tt</sup>. **C)** N-terminally mCherry-tagged Swr1<sup>Tt</sup>. **D)** C-terminally GFP-tagged Mot1<sup>Tt</sup>. **E)** C-terminally GFP-tagged Rad16A<sup>Tt</sup>. Arrows in the images for fluorescence localization indicate signals in nuclei. The scale bar denotes 10  $\mu$ m. **F)** Schematic diagram of the subcellular localization of fluorescent signals. Triangle-the selected hMIC; +-unselected hMIC; Z-zygotic nuclei; #-zygotic nuclei undergoing post-zygotic nuclear divisions; S-progeny MAC Anlagen; star-progeny MIC; pMAC-degrading parental MAC.



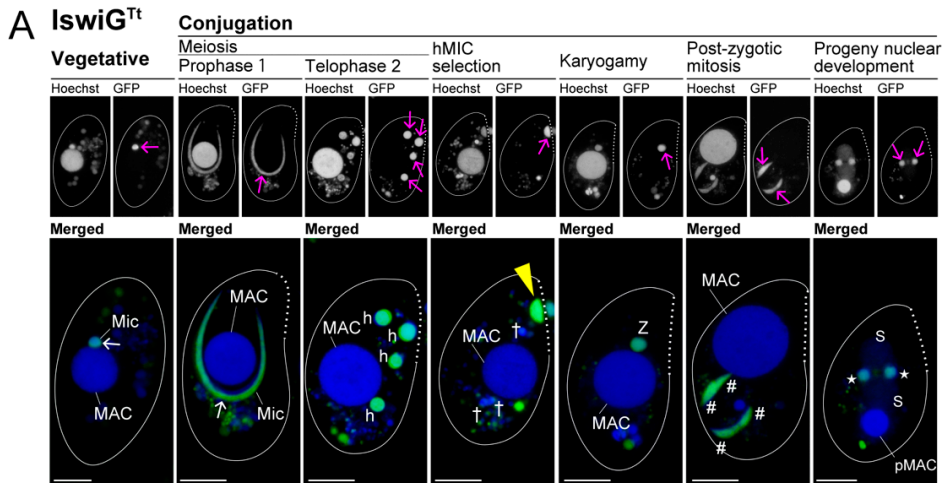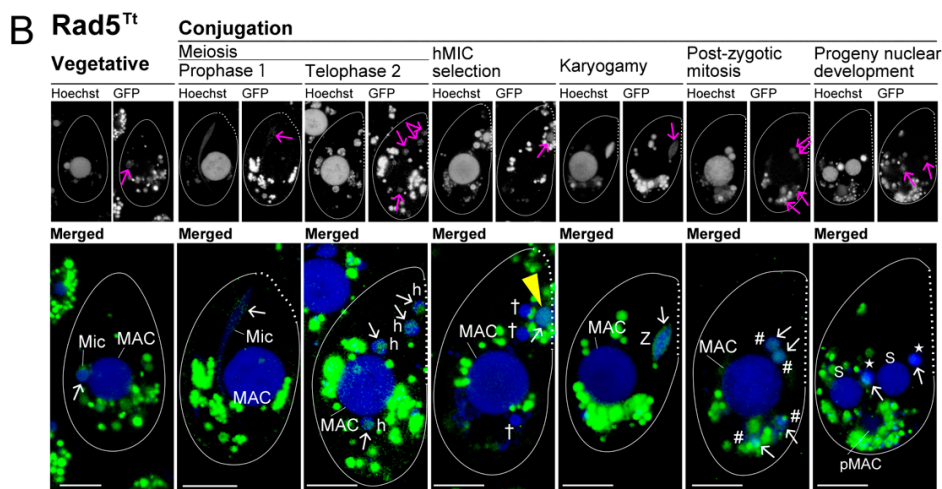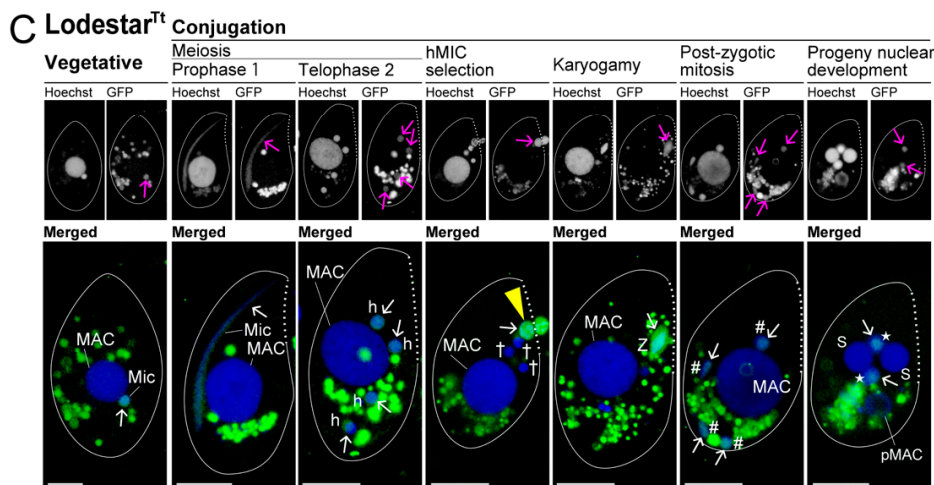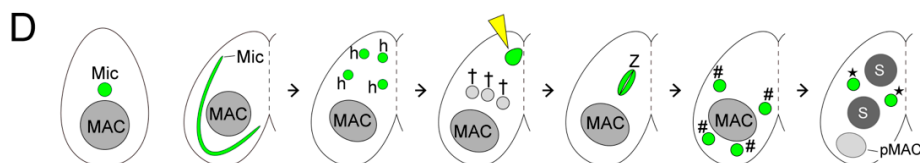

**Supplemental figure S6** Subcellular localization of *Tetrahymena* Snf2 family proteins tagged with C-terminal GFP. Tagged proteins shown here exclusively localized to the MIC. **A)** C-terminally GFP-tagged IswiG<sup>Tt</sup>. **B)** C-terminally GFP-tagged Rad5<sup>Tt</sup>. **C)** C-terminally GFP-tagged Lodestar<sup>Tt</sup>. **D)** The cartoon shows fluorescent signals. Triangle-the selected hMIC; + - unselected hMIC; Z-zygotic nuclei; #-zygotic nuclei undergoing post-zygotic nuclear divisions; S-progeny MAC Anlagen; star-progeny MIC; pMAC-degrading parental MAC.

A

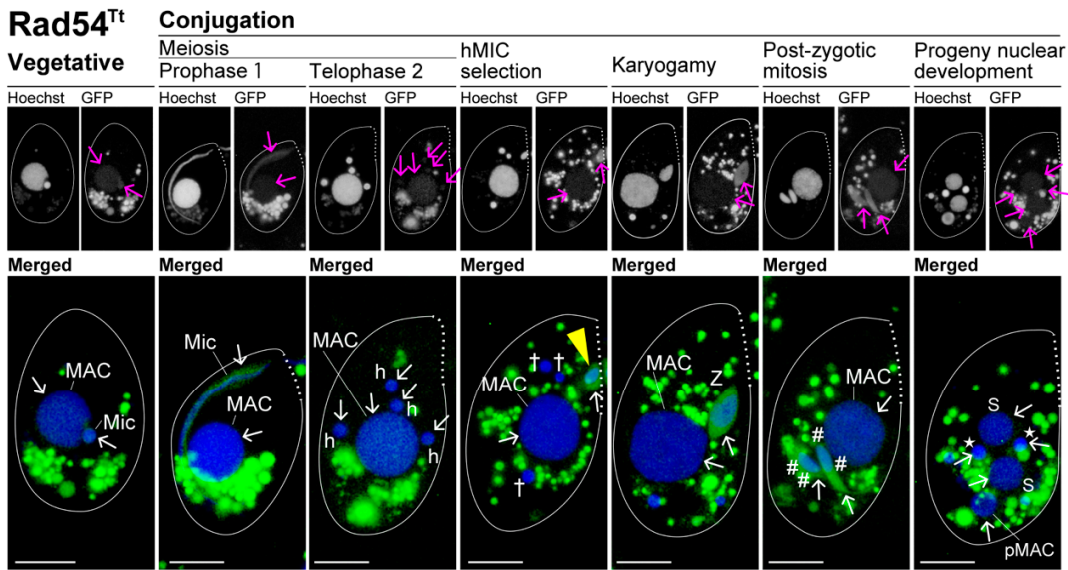

B

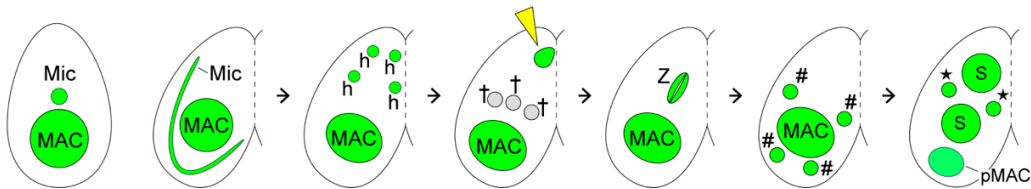

**Supplemental figure S7** Subcellular localization of C-terminally GFP-tagged Rad54<sup>Tt</sup> **A)** Rad54<sup>Tt</sup>-EGFP appeared in both the MAC and MIC. **B)** Schematic diagram of the subcellular localization of fluorescent signals. Triangle-the selected hMIC; †-unselected hMIC; Z-zygotic nuclei; #-zygotic nuclei undergoing post-zygotic nuclear divisions; S-progeny MAC Anlagen; star-progeny MIC; pMAC-degrading parental MAC.

A

# Smarcal1A<sup>Tt</sup>

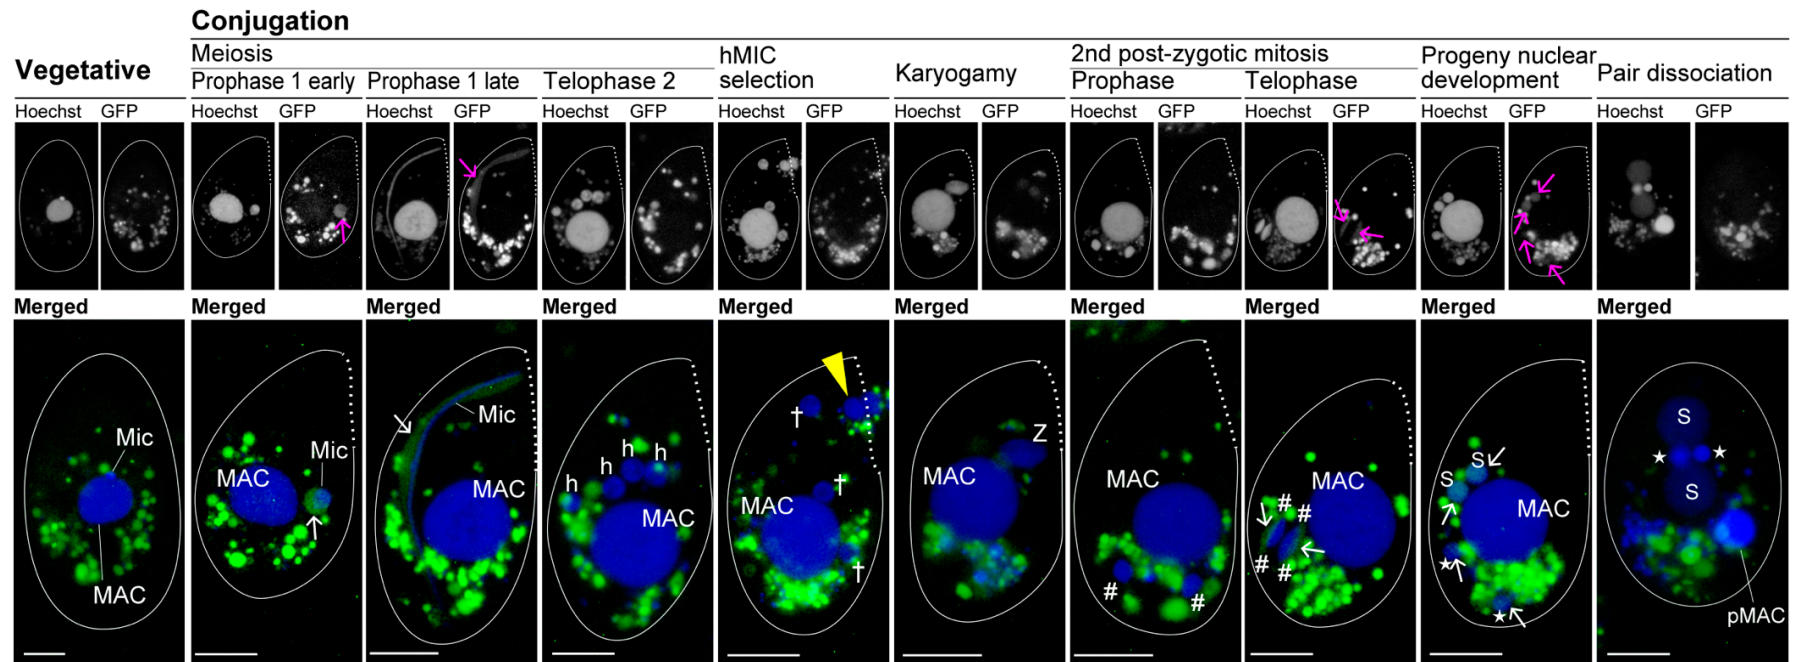

B

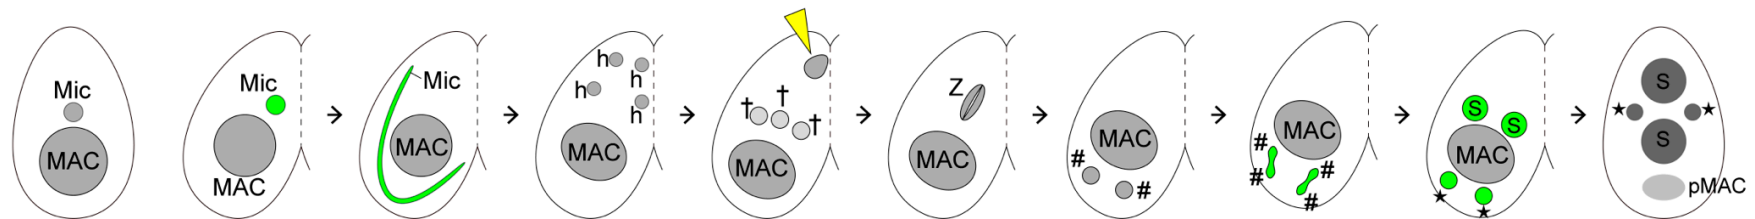

**Supplemental figure S8** Subcellular localization of C-terminally GFP-tagged Smarcal1A<sup>Tt</sup>. **A)** C-terminally GFP-tagged Smarcal1A<sup>Tt</sup> appeared in the MIC undergoing meiosis anaphase 1 and zygotic nuclei undergoing 2nd post-zygotic mitosis. **B)** Schematic diagram of the subcellular localization of fluorescent signals. Triangle-the selected hMIC; †-unselected hMIC; Z-zygotic nuclei; #-zygotic nuclei undergoing post-zygotic nuclear divisions; S-progeny MAC Anlagen; star-progeny MIC; pMAC-degrading parental MAC.



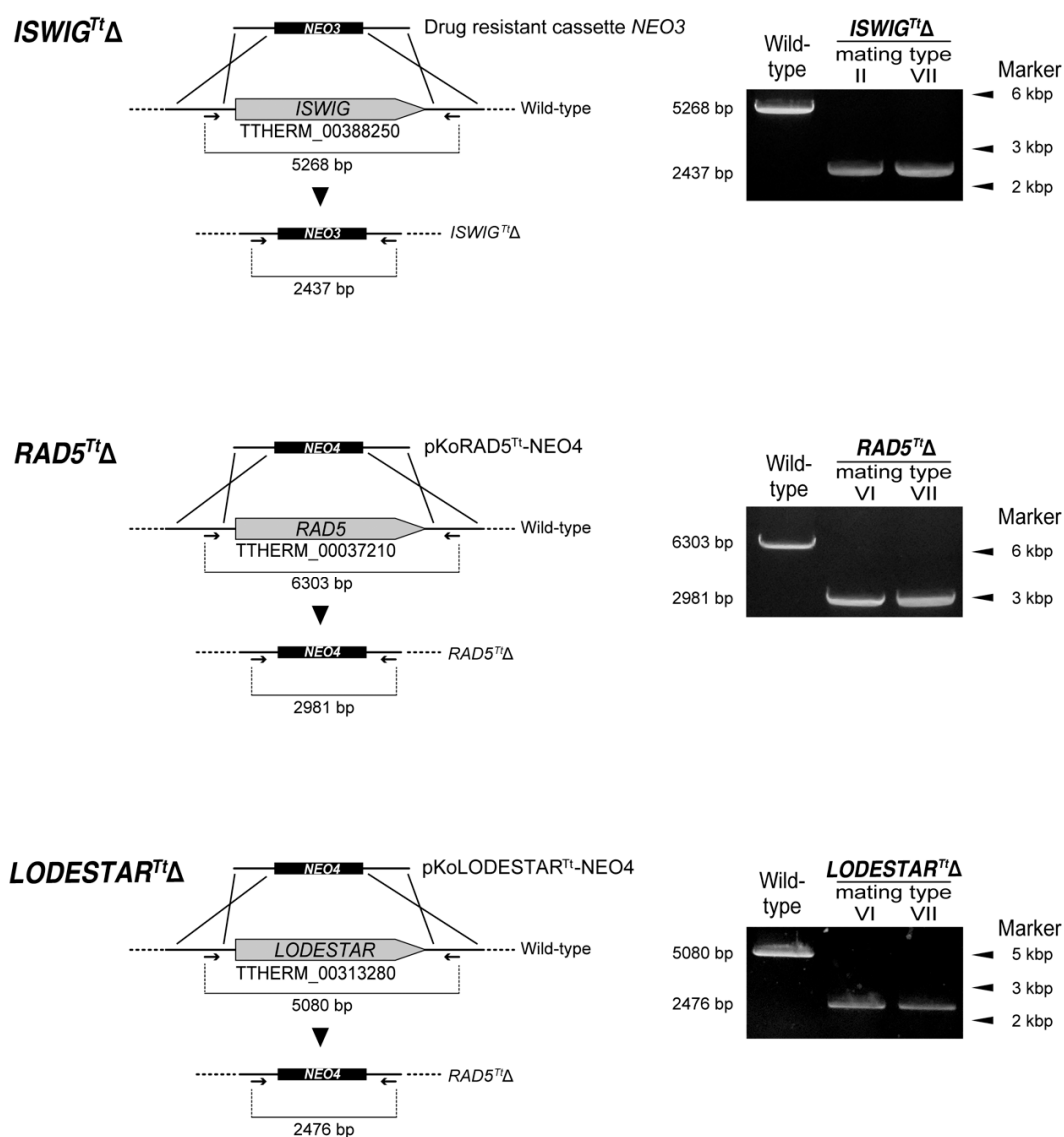

**Supplemental figure S9** Generation of *ISWIG<sup>Tt</sup>Δ*, *Lodestar<sup>Tt</sup>Δ*, and *RAD5<sup>Tt</sup>Δ* cells and PCR confirmation. Schematic diagrams for each knockout target gene show the following items. Upper-the knockout vector carrying the *NEO* cassette; Middle- the wild-type locus of the target gene. Lower-after homologous recombination. The primer sets, represented by arrows, are located upstream and downstream of the target gene locus. In the gel image, amplified PCR products from the wild-type genome are longer than those from knockout mutants because the *NEO* cassettes are shorter than genes encoding MIC localizing Snf2 family proteins.

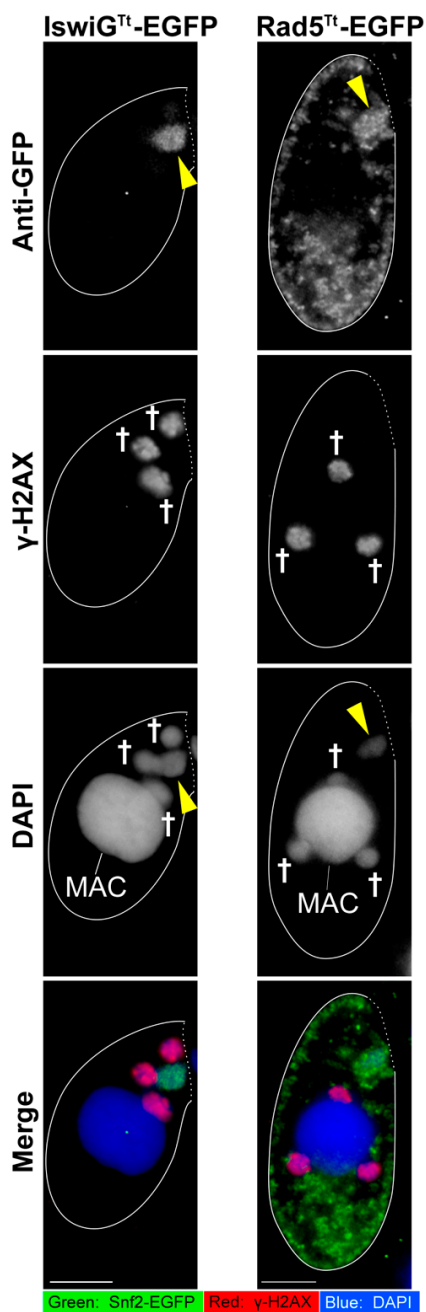

**Supplemental figure S10** The IswiG<sup>Tt</sup> and Rad5<sup>Tt</sup> appeared in the selected hMIC in which γ-H2AX foci vanished. Triangle: selected hMIC, †: unselected hMIC. The scale bar denotes 10 μm.

## Supplemental tables

Supplemental table S1. List of Snf2 genes found in *Tetrahymena* genome

| TGD ID         | Group        | Subfamil | Name                    | Subcelluar localization                                                           | Tagging         | Note                                                                          |
|----------------|--------------|----------|-------------------------|-----------------------------------------------------------------------------------|-----------------|-------------------------------------------------------------------------------|
| TTHERM_0124564 | SNF2-like    | Snf2     | Brg1 <sup>Ti</sup>      | MAC [46]                                                                          | -               |                                                                               |
| TTHERM_0013761 |              | Iswi     | IswiS <sup>Ti</sup>     | MAC                                                                               | C-terminal EGFP |                                                                               |
| TTHERM_0038825 |              | Iswi     | IswiG <sup>Ti</sup>     | MIC, hMIC, selected hMIC, zygotic nuclei, progeny MIC                             | C-terminal EGFP |                                                                               |
| TTHERM_0004931 |              | Mi-2     | Chd3 <sup>Ti</sup>      | MAC [9]                                                                           | -               |                                                                               |
| TTHERM_0019380 |              | Chd7     | Chd7 <sup>Ti</sup>      | MAC [9]                                                                           | -               |                                                                               |
| TTHERM_0154686 | SWR1-like    | Swr1     | Swr1 <sup>Ti</sup>      | MAC                                                                               | N-terminal      |                                                                               |
| TTHERM_0034357 |              | Ino80    | Ino80 <sup>Ti</sup>     | MAC                                                                               | N-terminal      |                                                                               |
| TTHERM_0052694 | SSO1653-like | Mot1     | Mot1 <sup>Ti</sup>      | MAC                                                                               | C-terminal EGFP |                                                                               |
| TTHERM_0023749 | RAD54-like   | Rad54    | Rad54 <sup>Ti</sup>     | MAC, MIC, hMIC, selected hMIC, zygotic nuclei, progeny MAC, and progeny MIC       | C-terminal EGFP |                                                                               |
| TTHERM_0003721 | RAD5/16-like | Rad5/16  | Rad5 <sup>Ti</sup>      | MIC, hMIC, selected hMIC, zygotic nuclei, progeny MIC                             | C-terminal EGFP |                                                                               |
| TTHERM_0042048 |              | Rad5/16  | Rad16A <sup>Ti</sup>    | MAC                                                                               | C-terminal EGFP |                                                                               |
| TTHERM_0093325 |              | Rad5/16  | Rad16B <sup>Ti</sup>    | Not examined                                                                      | -               | Expression is not active throughout life cycle.                               |
| TTHERM_0031328 |              | Lodestar | Lodestar <sup>Ti</sup>  | MIC, hMIC, selected hMIC, zygotic nuclei, progeny MIC                             | C-terminal EGFP |                                                                               |
| TTHERM_0108050 |              | Smarcal1 | Smarcal1A <sup>T</sup>  | MIC (meiosis 1) and zygotic nuclei after the anaphase of 2nd post zygotic mitosis | C-terminal EGFP |                                                                               |
| TTHERM_0062715 |              | Smarcal1 | Smarcal1B <sup>Ti</sup> | Not examined                                                                      | -               | Expression begins from late phase (after 8 hours post mixing) of conjugation. |

Supplemental table S2. Primer sets for C-terminal EGFP-tagging and N-terminal mCherry-tagging

| TGD ID          | Name                    | Primer name*     | Sequences <sup>‡</sup>                                  |
|-----------------|-------------------------|------------------|---------------------------------------------------------|
| TTHERM_00137610 | IswiS <sup>Tt</sup>     | MACISWI-EGFP1F   | TCCACCGCGGTGGCGGCCGCaattcagccatttacaataaatc             |
|                 |                         | MACISWI-EGFP2R   | CCCTTAGAAACCATGGATCCCatcacgctttaacttttttaagg            |
|                 |                         | MACISWI-EGFP5F   | TCGATACCGTCGACCTCGAGacctgttaataaataagataataatc          |
|                 |                         | MACISWI-EGFP6R   | TATAGGGCGAATTGGGTACCTagaagggttaggtcacaga                |
| TTHERM_00388250 | IswiG <sup>Tt</sup>     | MICISW2-EGFP1F   | TCCACCGCGGTGGCGGCCGCaggaaaagcttggaattattg               |
|                 |                         | MICISW2-EGFP2R   | CCCTTAGAAACCATGGATCCctttttaactatttatcaattttactaa        |
|                 |                         | MICISW2-EGFP5F   | TCGATACCGTCGACCTCGAGtaaaactatttattagtgtccctc            |
|                 |                         | MICISW2-EGFP6R   | TATAGGGCGAATTGGGTACCaataggcaattgttatcttagtg             |
| TTHERM_01546860 | Swr1 <sup>Tt</sup>      | SWR1-NmCherry1F  | GGGAACAAAAGCTGGAGCTCtaaacctagttgatataaacctcatctcc       |
|                 |                         | SWR1-NmCherry2R  | TTTGAAGATATCAAGTCGACtttcttcataataagaaaccttgactc         |
|                 |                         | SWR1-NmCherry5F  | ATGAATTATATAAGGGATCCagttcggagtaggataaaaaccaaac          |
|                 |                         | SWR1-NmCherry6R  | TATAGGGCGAATTGGGTACCTaaacctttagtgaggattcagc             |
| TTHERM_00343570 | Ino80 <sup>Tt</sup>     | INO80-NmCherry1F | TCCACCGCGGTGGCGGCCGCtatgactttgtatatactatgtatctcc        |
|                 |                         | INO80-NmCherry2R | TTTGAAGATATCAAGTCGACtgataatctctctttatgaaagc             |
|                 |                         | INO80-NmCherry5F | ATGAATTATATAAGGGATCCatgctttggatgaaggggtgt               |
|                 |                         | INO80-NmCherry6R | TATAGGGCGAATTGGGTACCTactattaagtcggtgttagagc             |
| TTHERM_00526940 | Mot1 <sup>Tt</sup>      | MOT1-EGFP01F     | TCCACCGCGGTGGCGGCCGCtatcaatagtagaactagatagatgg          |
|                 |                         | MOT1-EGFP02R     | CCCTTAGAAACCATGGATCCCatattctttattatcatctgttaaccc        |
|                 |                         | MOT1-EGFP05F     | TCGATACCGTCGACCTCGAGtttgctttataataacttacctgcc           |
|                 |                         | MOT1-EGFP06R     | TATAGGGCGAATTGGGTACCaagagcataagattctattcttattagc        |
| TTHERM_00237490 | Rad54 <sup>Tt</sup>     | RAD54_EGFP1F     | TCCACCGCGGTGGCGGCCGCaatcagaatttgcaaagaattcg             |
|                 |                         | RAD54_EGFP2R     | CCCTTAGAAACCATGGATCCttttttaatttttaagtataattttggc        |
|                 |                         | RAD54_EGFP5F     | TCGATACCGTCGACCTCGAGactaaatcaaaaagataatttaattatcg       |
|                 |                         | RAD54_EGFP6R     | TATAGGGCGAATTGGGTACCTtgattttgacttgaataattactgg          |
| TTHERM_00037210 | Rad5 <sup>Tt</sup>      | Rad5-EGFP1F      | TCCACCGCGGTGGCGGCCGCaggaaaacacaggttaacaaaacc            |
|                 |                         | Rad5-EGFP2R      | CCCTTAGAAACCATGGATCCCatatgttgacattagatatttaaagtgc       |
|                 |                         | Rad5-EGFP5F      | TCGATACCGTCGACCTCGAGactaatatcaatctattctctaaaacat        |
|                 |                         | Rad5-EGFP6R      | ATAGGGCGAATTGGGTACCTcaatcataataaattcttagtgctc           |
| TTHERM_00420480 | Rad16A <sup>Tt</sup>    | RAD16A-EGFP1F    | TCCACCGCGGTGGCGGCCGCttattagtagcttaataaaccttcagatg       |
|                 |                         | RAD16A-EGFP2R    | CCCTTAGAAACCATGGATCCattcaatatctgtataagaattcttttgc       |
|                 |                         | RAD16A-EGFP5F    | TCGATACCGTCGACCTCGAGtaatttcaataaattttatatttaacctaataatg |
|                 |                         | RAD16A-EGFP6R    | TATAGGGCGAATTGGGTACCTactgaaaatcaagagataattttgtgc        |
| TTHERM_00313280 | Lodestar <sup>Tt</sup>  | Lodestar-EGFP1F  | TCCACCGCGGTGGCGGCCGCtttagatgggtgtctcactggtactcc         |
|                 |                         | Lodestar-EGFP2R  | CCCTTAGAAACCATGGATCCtaatttatcttcagctctaaattttttatgg     |
|                 |                         | Lodestar-EGFP5F  | TCGATACCGTCGACCTCGAGaacaataaaaaataaaattttatgcg          |
|                 |                         | Lodestar-EGFP6R  | TATAGGGCGAATTGGGTACCTtaattcaagttatctctaaatgttgc         |
| TTHERM_01080500 | Smarcal1A <sup>Tt</sup> | Smarcal1A-EGFP1F | TCCACCGCGGTGGCGGCCGCaaatggctcttcatcaatgttttctgc         |
|                 |                         | Smarcal1A-EGFP2R | CCCTTAGAAACCATGGATCCaaaatgctactttgctaatttcaaaagtgc      |
|                 |                         | Smarcal1A-EGFP5F | TCGATACCGTCGACCTCGAGtttgattttaaacaatatttaattggtc        |
|                 |                         | Smarcal1A-EGFP6R | TATAGGGCGAATTGGGTACCCagataaaacatctgttttgagatgc          |

\*: Amplified products from EGFP/NmCherry1F-2R and EGFP/NmCherry5F-6R are 5' and 3' regions giving homologous recombination, respectively.

<sup>‡</sup>: Capital letters correspond to the region for homologous recombination with plasmids, and lowercase letters correspond to the region matching to the *Tetrahymena* genome.

Supplemental table S3. Antibodies used in the indirect immunofluorescence observations

| Figure No. | Primary antibody             |          |           |           | Secondary antibody |                  |          |          |                   |
|------------|------------------------------|----------|-----------|-----------|--------------------|------------------|----------|----------|-------------------|
|            | Epitope                      | Dilution | Cat. No.  | Company   | Epitope            | Label            | Dilution | Cat. No. | Company           |
| 4          | $\gamma$ -H2AX (H2AX S139ph) | 1:1000   | 613401    | BioLegend | Mouse IgG (H+L)    | FITC             | 1:500    | 31541    | Thermo Scientific |
| 5          | H3K9ac                       | 1:1000   | MAB10305S | MBL       | Mouse IgG (H+L)    | Alexa Fluor® 568 | 1:500    | ab175700 | Abcam             |
|            | H3K18ac                      | 1:1000   | ab40888   | Abcam     | Rabbit IgG (H+L)   | Rhodamine        | 1:500    | 31686    | Thermo Scientific |
|            | H3K56ac                      | 1:1000   | 39282     | Activ     | Rabbit IgG (H+L)   | Rhodamine        | 1:500    | 31686    | Thermo Scientific |
| S9         | GFP                          | 1:1000   | 598       | MBL       | Rabbit IgG         | DyLight™ 488     | 1:500    | 406404   | BioLegend         |
|            | $\gamma$ -H2AX (H2AX S139ph) | 1:1000   | 613401    | BioLegend | Mouse IgG (H+L)    | Alexa Fluor® 568 | 1:500    | ab175700 | Abcam             |

Supplemental table S4. Primer sets for somatic gene knockout plasmids

| Target                       | TGD ID         | Primer name*        | Sequences                                          |
|------------------------------|----------------|---------------------|----------------------------------------------------|
| <i>LODESTAR<sup>fl</sup></i> | THERM_00313280 | LodestarKO_pNeo4_1F | TCCACCGCGGTGGCGGCCGCTtaattcaagttatcctaaatgtgtgc    |
|                              |                | LodestarKO_pNeo4_2R | TATTTTTTAGAAATAAATTGTaacaattaaaaataaaattttatgctgc  |
|                              |                | LodestarKO_pNeo4_5F | ACTGGAAAAATGCAGCCCGGGagtgaaagcaataaatcaatatcgtg    |
|                              |                | LodestarKO_pNeo4_6R | TATAGGGCGAATTGGGTACCtctttttgaataccataccaagag       |
| <i>RAD5<sup>fl</sup></i>     | THERM_00037210 | Rad5KO_pNeo4_1F     | CTCCACCGCGGTGGCGGCCGCTcaatcataataatctttagtgtgc     |
|                              |                | Rad5KO_pNeo4_2R     | TATTTTTTAGAAATAAATTGTactaatatcaatctattccttaaaacat  |
|                              |                | Rad5KO_pNeo4_5F     | ACTGGAAAAATGCAGCCCGGGtgagtaataaaagatatgcaaaatctatg |
|                              |                | Rad5KO_pNeo4_6R     | CTATAGGGCGAATTGGGTACCatattgttaaatcttcactaaacctg    |
| <i>RAD54<sup>fl</sup></i>    | THERM_00237490 | Rad54KO_pNeo4_1F    | CTCCACCGCGGTGGCGGCCGCTgtatttgacttgaaatattactgg     |
|                              |                | Rad54KO_pNeo4_2R    | TATTTTTTAGAAATAAATTGTactaatcaaaaaagatatattaattatcg |
|                              |                | Rad54KO_pNeo4_5F    | ACTGGAAAAATGCAGCCCGGGtgatttatttattctttaaatctatcc   |
|                              |                | Rad54KO_pNeo4_6R    | CTATAGGGCGAATTGGGTACCagtatatagaggctttttgtg         |

\*: Amplified products from pNoe4\_1F-2R and pNoe4\_5F-6R are 5' and 3' regions giving homologous recombination, respectively.

Supplemental table S5. Primer sets for PCR evaluating somatic gene replacement

| Target                       | TGD ID         | Primer name       | Sequences                      |
|------------------------------|----------------|-------------------|--------------------------------|
| <i>LODESTAR<sup>fl</sup></i> | THERM_00313280 | LodestarKO_SG-F   | tagaatgttattactcttcattggc      |
|                              |                | LodestarKO_SG-R   | caatttatctaaattttgatacatagctcg |
| <i>RAD5<sup>fl</sup></i>     | THERM_00037210 | Rad5KO_SG-F       | tagaatgttattactcttcattggc      |
|                              |                | Rad5KO_SG-R       | caatttatctaaattttgatacatagctcg |
| <i>RAD54<sup>fl</sup></i>    | THERM_00237490 | Rad54KO_SG-F      | gcagtaatcagtgatggttcttacg      |
|                              |                | Rad54KO_SG-R      | ttatggagaattgcttgataatctgc     |
| <i>ISWIG<sup>fl</sup></i>    | THERM_00388250 | IswiG_Neo3KO_SG-F | ttgaatatggaggtttagcttgc        |
|                              |                | IswiG_Neo3KO_SG-R | taaaaggtctgcgcatagttatagc      |
